# Supplementary material for: Alternative Culture Systems for Bovine Oocyte In Vitro Maturation: Liquid Marbles and Differentially Shaped 96-Well Plates
Source: MDPI journal article supplement (doi:10.3390/ani13101635), 2023-05-14
Supplement: s1 [file s1]

## Supporting information

**Table S1.** Developmental results of the pilot study in v-shaped 96-well plates.

| Treatment     | No. embryos | Cleavage    | Blastocyst Day 7 | Blastocyst Day 8 |
|---------------|-------------|-------------|------------------|------------------|
| Control Group | 252         | 78.6 ± 2.6  | 19.8 ± 2.5       | 31.7 ± 2.9       |
| V-60          | 155         | 84.5 ± 2.9* | 21.3 ± 3.3       | 34.2 ± 3.8       |
| V-120         | 148         | 79.1 ± 3.3  | 20.9 ± 3.3       | 29.1 ± 3.7       |
| OV-30         | 160         | 73.1 ± 3.5  | 17.5 ± 3.0       | 28.1 ± 3.6       |
| OV-60         | 163         | 79.1 ± 3.2  | 21.5 ± 3.2       | 35.6 ± 3.8       |
| OV-120        | 143         | 69.9 ± 3.8* | 22.4 ± 3.5       | 34.3 ± 4.0       |

Cleavage, day 7 and day 8 blastocyst rates expressed as a percentage of presumed zygotes. \* Significant differences ( $P < 0.05$ ). Results are expressed as least square means ± standard error.

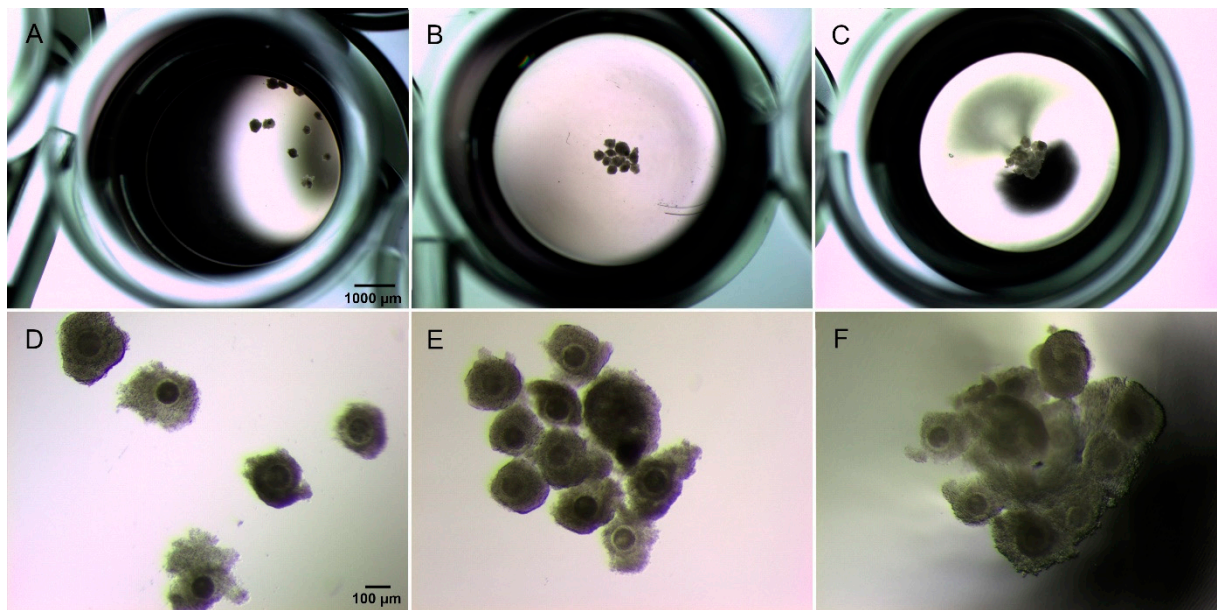

**Figure S1. Organization of oocytes in three differentially shaped 96-well plates.** The images show differences in interactions between immature cumulus-oocyte complexes when cultured in three surface geometries: flat (A, D), ultra-low attachment round-bottom (B, E), and v-shaped (C, F) 96-well plates.

**Table S2.** Summary of main results of the tested systems.

|        | Treatment     | MII (%)    | Blastocyst Day 8 (%) | TCN                      | ICM/TCN    | AC/TCN                  |
|--------|---------------|------------|----------------------|--------------------------|------------|-------------------------|
| Exp. 1 | Control Group | 87 ± 4.1   | 40.1 ± 4.6           | 117.8 ± 8.6 <sup>a</sup> | 30.9 ± 1.3 | 2.0 ± 0.5 <sup>a</sup>  |
|        | 2D Droplets   | 84.9 ± 4.9 | 38.8 ± 4.2           | 82.3 ± 5.1 <sup>b</sup>  | 32.6 ± 1.4 | 3.9 ± 0.5 <sup>b</sup>  |
|        | LM            | 88.3 ± 4.1 | 26.1 ± 3.7           | 91.3 ± 5.1 <sup>b</sup>  | 33.7 ± 1.3 | 3.5 ± 0.5 <sup>ab</sup> |
| Exp. 2 | Control Group | 86.8 ± 5.5 | 36.4 ± 2.4           | 134.6 ± 5.2 <sup>a</sup> | 38.6 ± 3.9 | 1.7 ± 0.3               |
|        | F-60          | 84.9 ± 4.9 | 41.3 ± 2.8           | 112.4 ± 5.1 <sup>b</sup> | 34.5 ± 3.9 | 2.2 ± 0.3               |
|        | V-60          | 90.2 ± 4.2 | 37.3 ± 2.5           | 112.2 ± 5.1 <sup>b</sup> | 39.4 ± 3.8 | 1.7 ± 0.3               |
|        | R-60          | 91.1 ± 4.2 | 38.8 ± 2.5           | 97.6 ± 5.6 <sup>b</sup>  | 41.9 ± 4.2 | 1.7 ± 0.3               |

Metaphase II (MII) ratio of oocytes analyzed with Hoechst staining. Day 8 blastocyst rates expressed as a percentage of presumed zygotes. Different superscripts per column (a and b) represent statistical differences ( $P < 0.05$ ) among groups. Results are expressed as least square means ± standard error.

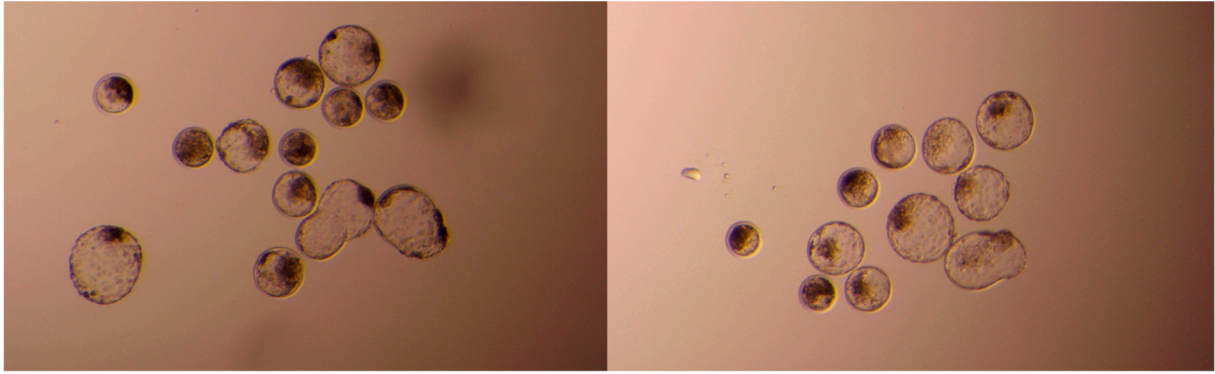

**Figure S2.** Representative images of bovine day 8 blastocysts.

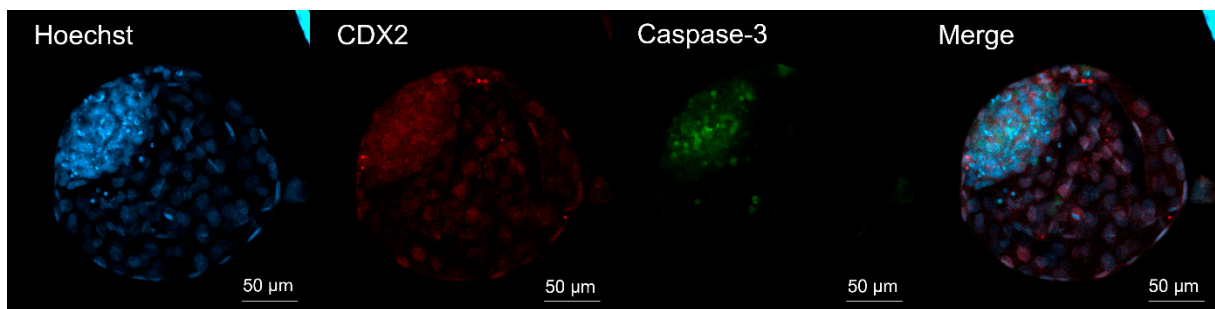

**Figure S3. Differential apoptotic staining of day 8 blastocyst.** Hoechst 33342 (blue fluorescence) was used to stain the nuclei of both trophoblast and inner cell mass cells; CDX2 (red fluorescence) was used to specifically stain trophoblast cells; and anti-caspase 3 (green fluorescence) was used to stain apoptotic cells.
